# Supplementary material for: Abnormal Expression of BTLA and CTLA‐4 Immune Checkpoint Molecules in Chronic Lymphocytic Leukemia Patients
Source: Hindawi journal article supplement (doi:10.1155/2020/6545921), 2020-01-01

**A**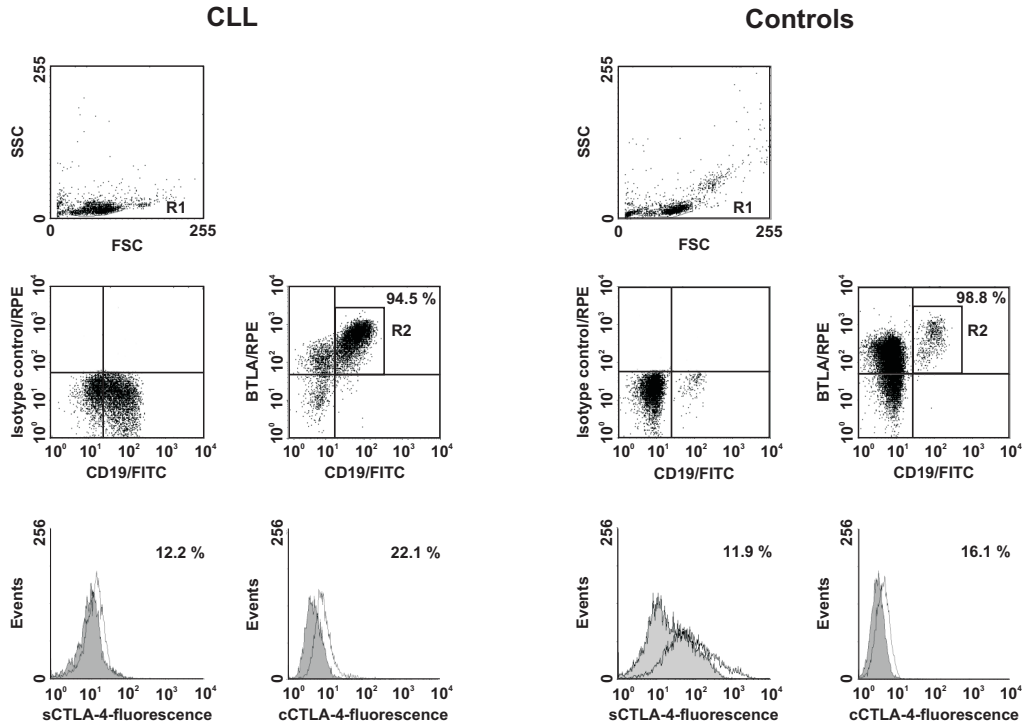**B**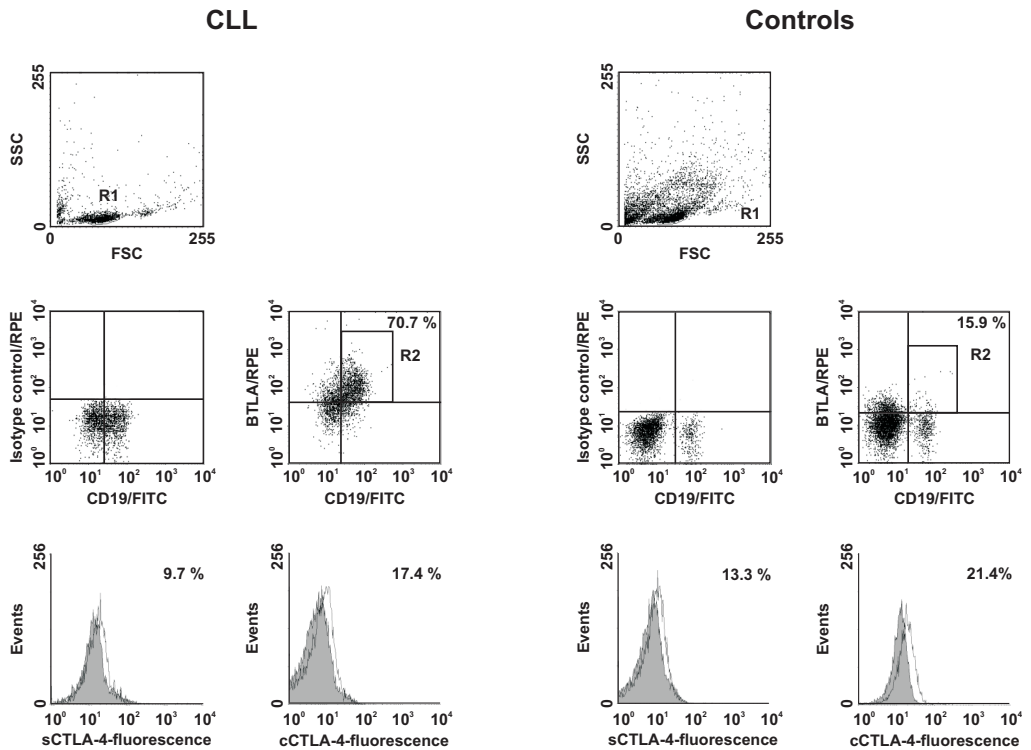

Supplement: f3 [file 6545921.f3.pdf]
